# Supplementary material for: IgM N-glycosylation correlates with COVID-19 severity and rate of complement deposition
Source: Research Square preprint supplement (doi:10.21203/rs.3.rs-2939468/v1), 2023-06-02
Supplement: Supplementary file 1 [file 36d525f26b3715fabb2708d9.xlsx]

## Sheet: Sheet1
sample_id
				sample_id	DPM1	ST3GAL1	POMT2	MAN2B2	ALG1	PIGV	ST3GAL6	PIGB	ST6GALNAC1	ST6GALNAC2	ST6GAL1	ALG9	EDEM2	ST8SIA5	MAN2B1	MANBA	ST3GAL4	ST8SIA1	MAN1A1	MAN2A1	ST8SIA4	ST3GAL5	EDEM3	ST6GALNAC5	MAN1C1	PIGZ	ALG2	TMTC4	C20orf173	ST3GAL3	SDF2L1	POMT1	TMTC1	EDEM1	ST6GALNAC4	TMTC3	MAN2C1	ST8SIA2	PIGM	ST6GAL2	ST8SIA6	DPY19L4	ST3GAL2	ALG8	ST6GALNAC6
0865-0000SB00-003	0865-0000SB00-003	003-0001	CVD4 Y1	0865-0000SB00-003	130	956	35	428	103	98	107	111	16	34	522	8	493	0	996	485	88	10	1504	288	461	97	403	1	72	7	121	78	2	16	109	161	82	412	2661	18	622	0	78	2	20	40	517	81	340
				0865-0001FG00-003	547	2506	151	1521	492	282	315	254	95	64	3626	70	1803	64	3518	1112	419	50	3188	1239	1381	1100	1289	9	335	66	638	227	7	195	1698	545	425	2444	711	89	2202	26	314	30	66	149	1622	468	994
				0865-0001PK00-003	624	3741	173	2169	594	570	402	417	256	56	5394	58	2050	0	4088	1652	396	84	1773	1228	1490	1069	1473	1	532	74	808	380	0	344	1229	1022	421	2810	563	105	3639	0	548	2	63	209	1987	431	1888
0865-000BRH00-017	0865-000BRH00-017	003-0006	CVD4 R1	0865-000BRH00-017	226	1520	200	665	240	154	239	143	99	75	1331	85	878	107	1277	683	384	125	1463	455	973	402	663	7	195	31	341	144	12	144	568	185	171	999	529	58	547	51	230	56	36	60	1039	265	366
0865-000DDC00-003	0865-000DDC00-003	003-0007	CVD4 R2	0865-000DDC00-003	674	4639	168	1829	567	606	407	455	148	80	6539	75	2192	4	3421	1493	613	51	2835	1199	2552	870	2052	0	558	33	770	410	4	284	1352	975	4	3142	473	209	2320	1	336	2	69	291	1908	594	1937
0865-000DJC00-009	0865-000DJC00-009	003-0008	CVD4 R3	0865-000DJC00-009	319	2198	78	1082	383	349	203	223	115	89	2403	26	1619	1	1878	880	545	22	3084	572	973	200	1251	0	155	28	511	122	2	158	1101	264	80	1855	1828	68	830	0	279	1	29	77	1714	330	642
				0865-000H3E00-017	122	2709	71	392	115	153	167	118	17	61	772	36	560	25	1200	825	177	27	1031	336	542	144	556	5	81	32	152	74	1	111	202	159	143	502	1377	29	557	11	126	18	23	54	788	149	432
				0865-000KGF00-011	459	1929	91	1201	269	413	263	248	60	182	1782	16	2107	4	1701	1038	1808	11	2297	525	1640	177	1240	0	131	37	413	116	1	96	643	243	70	1245	901	47	791	0	253	1	12	52	3309	265	387
				0865-000KQH00-012	345	3045	90	1588	555	387	308	306	83	72	3753	49	2148	2	4574	1717	337	16	3251	1034	1745	496	1645	0	242	33	580	223	0	382	1720	627	80	2695	1519	98	2231	0	416	1	32	96	1775	409	846
				0865-000KVE00-012	495	3004	110	2439	558	191	214	298	111	54	3271	31	2491	0	4437	1263	566	11	4207	1289	1445	711	1227	0	296	76	744	215	1	291	2348	644	66	2379	1277	76	2486	0	227	0	131	90	1354	563	1927
0865-0011GJ00-003	0865-0011GJ00-003	003-0014	CVD4 R8	0865-0011GJ00-003	491	1484	71	1309	230	344	448	349	19	336	1837	46	1857	27	1872	1616	1418	38	2262	560	2356	216	1741	3	170	32	330	108	3	125	748	397	520	2722	206	86	893	11	359	17	23	114	2923	336	280
				0865-00131C00-002	626	2474	87	1846	221	537	747	843	41	924	1177	15	2493	2	2283	2292	2843	2	3817	624	5212	197	2314	0	115	22	425	105	0	59	357	334	482	1946	180	54	943	1	312	0	17	88	6542	198	334
				0865-0018WK00-002	226	1900	90	722	236	278	151	83	17	23	1940	30	1021	1	1147	716	175	6	1750	567	720	235	593	1	211	15	297	80	1	127	661	257	167	762	1780	49	607	0	249	0	26	24	742	241	449
0865-0019SJ00-003	0865-0019SJ00-003	003-0020	CVD4 G3	0865-0019SJ00-003	729	3569	208	3016	725	737	645	525	39	77	3785	49	3794	2	7715	2730	491	22	3071	1530	3249	2023	2182	1	407	93	1024	608	1	243	1470	656	497	2097	442	112	2715	7	578	0	83	157	2971	630	1096
0865-001BVA00-002	0865-001BVA00-002	003-0021	CVD4 G4	0865-001BVA00-002	591	2957	176	1506	429	580	363	336	49	43	4228	62	2086	27	2636	1311	447	43	1881	1031	1805	1140	1428	6	650	34	710	318	3	195	849	606	422	1571	1033	129	1604	9	466	18	55	153	1946	601	1579
				0865-001CWK00-003	595	2817	153	1820	844	508	364	379	28	117	3692	60	3081	13	5716	2019	396	10	4772	1592	1941	723	1839	0	204	58	985	396	2	250	3215	643	284	3126	1008	79	2298	1	446	0	57	144	2036	752	676
				0865-001F5A00-002	671	2737	179	1708	476	650	732	395	69	147	3369	41	3752	0	2764	1392	2235	24	2200	885	2102	727	1778	0	503	28	705	245	0	198	1373	502	1635	1801	765	80	1613	0	448	2	28	122	3788	529	915
				0865-001FYK00-002	437	1751	132	1179	381	385	402	326	25	138	2208	42	1618	39	3095	1558	294	50	2810	1066	2106	528	1822	7	193	60	629	309	2	129	1178	432	146	2554	362	117	1709	22	310	19	29	154	1419	398	406
				0865-001JPD00-002	125	651	255	400	111	150	208	126	46	35	1152	97	434	162	697	567	115	190	494	417	397	436	566	21	233	29	146	147	28	232	178	185	262	933	107	85	482	84	157	91	51	92	476	188	247
0865-001VFE00-003	0865-001VFE00-003	003-0025	CVD4 G5	0865-001VFE00-003	275	910	196	821	462	149	269	196	63	60	2255	57	1348	131	2314	890	295	85	3392	932	985	472	1096	15	226	54	493	271	11	218	1589	312	217	2131	379	98	843	58	253	71	33	112	770	449	322
				0865-001YXB00-002	666	2719	140	1978	824	440	671	407	44	100	3255	50	2509	12	5780	2242	464	25	3464	1523	2309	758	2286	0	337	40	987	602	1	273	2318	868	212	3693	736	116	2905	2	552	4	44	182	2298	673	1166
				0865-00227E00-002	564	2243	94	1413	471	394	633	393	49	311	2242	30	1947	2	3624	1729	917	15	2821	1151	2512	511	1786	0	218	42	608	313	1	146	1346	552	122	3000	418	95	1621	0	338	0	14	136	2228	408	681
0865-0038SC00-003	0865-0038SC00-003	003-0033	CVD4 G6	0865-0038SC00-003	692	4412	195	2510	896	606	173	381	65	42	9686	78	2764	8	3867	971	376	49	4099	1100	1361	1027	1177	0	823	18	1053	349	2	354	2615	791	58	2873	1390	130	1644	0	497	0	93	132	2249	838	2053
				0865-003DXB00-002	460	3835	160	2155	698	503	385	502	31	212	5625	47	3545	1	4400	1851	825	23	5364	1579	2760	726	2154	0	872	21	839	324	2	283	2117	811	175	3503	697	94	2537	0	440	4	51	136	3434	815	1202
				0865-003HGD00-002	584	1804	97	954	364	293	297	233	36	23	3568	45	1331	3	1953	738	171	32	3323	1134	1074	533	937	0	301	31	709	212	0	169	1481	461	12	2279	655	88	1108	0	302	0	36	155	988	391	828
0865-003JND00-003	0865-003JND00-003	003-0038	CVD4 R10	0865-003JND00-003	603	3859	155	2658	842	619	474	398	74	118	4035	64	2699	0	6207	2142	537	10	2481	1210	2111	930	1771	0	844	90	781	464	0	277	1335	987	77	1894	584	143	4277	0	562	0	121	189	2418	533	2361
0865-003L2B00-003	0865-003L2B00-003	003-0039	CVD4 Y5	0865-003L2B00-003	375	1892	153	1015	293	270	288	255	74	28	3275	79	988	66	1846	961	171	88	1684	940	1036	785	1143	11	487	35	460	329	9	177	688	395	82	1855	249	155	981	43	304	44	51	172	1046	392	937
				0865-003N4B00-002	974	4434	203	2460	679	483	100	361	84	99	6223	50	2140	1	2032	899	700	177	1489	1006	886	1262	1012	0	2188	2	1322	268	0	224	1714	895	142	4502	717	190	1133	0	315	0	147	147	3264	710	4238
				0865-003PQJ00-002	608	3355	183	2114	602	480	364	278	77	46	6454	46	2011	0	4021	1599	269	43	2761	1214	1472	894	1568	0	807	46	916	553	6	342	1876	721	28	2920	809	115	2235	0	573	5	61	161	1561	682	1695
0865-003VKB00-003	0865-003VKB00-003	003-0042	CVD4 Y6	0865-003VKB00-003	293	1070	48	602	243	164	221	195	2	26	1817	35	955	0	1336	610	126	49	2793	576	839	314	812	0	82	20	401	110	0	61	1085	192	4	1434	1435	40	784	0	156	0	26	70	567	249	326
				0865-003X2B00-003	572	3195	128	1353	263	411	517	493	21	197	4394	40	1482	1	1733	1447	492	82	4046	992	1698	477	1678	0	223	51	627	143	0	350	868	425	3	2750	2030	70	1541	0	284	4	33	171	2022	404	643
0865-0041MA00-003	0865-0041MA00-003	003-0044	CVD4 R5	0865-0041MA00-003	1099	2277	111	2310	557	546	447	534	21	149	2333	24	2401	9	4081	2730	577	8	5647	1076	3374	774	2917	0	76	79	1033	285	6	141	1879	395	478	2921	470	123	1540	0	467	0	31	153	1570	536	634
				0865-0044CE00-002	368	1324	49	768	150	267	361	282	22	123	1415	9	739	3	1022	916	294	33	1424	395	1186	302	923	0	71	18	275	75	0	69	291	241	0	1238	797	59	1023	0	153	1	22	75	955	174	292
0865-004BHC00-003	0865-004BHC00-003	003-0046	CVD4 R12	0865-004BHC00-003	682	3830	124	2819	550	521	499	437	106	181	4433	40	2250	3	6718	2324	627	4	2261	1240	2391	1133	1960	0	553	44	767	512	5	395	802	857	486	1954	461	99	4455	0	604	0	76	182	2448	466	1519
				0865-004D9G00-002	513	3501	134	2271	510	299	343	348	44	223	3951	45	1954	11	3757	1598	645	1	2294	998	1506	652	1315	0	375	26	508	384	0	437	1080	691	348	1538	964	97	3090	0	367	0	57	114	2226	402	1255
0865-004LKD00-003	0865-004LKD00-003	003-0047	CVD4 G7	0865-004LKD00-003	676	4305	203	2777	640	739	700	410	40	244	6002	64	2449	17	6562	2109	665	86	1618	1438	2459	1246	1885	0	767	39	1035	339	0	359	1128	923	257	2337	1182	123	4110	0	583	0	49	180	2847	600	1611
				0865-004QSK00-003	576	3291	175	2007	506	507	535	282	27	117	4557	53	1930	3	4711	1870	268	35	2022	1452	1646	814	1710	0	495	46	840	315	0	293	1062	728	140	2326	1242	111	3465	0	440	7	63	178	1576	595	1341
0865-004WYD00-003	0865-004WYD00-003	003-0053	CVD4 R13	0865-004WYD00-003	311	2543	41	954	229	257	191	151	40	208	1935	16	892	15	1546	750	382	9	1175	400	874	455	474	0	214	16	289	132	0	160	591	317	56	616	861	47	863	0	197	0	31	51	839	188	696
0865-004X1B00-003	0865-004X1B00-003	003-0054	CVD4 G8	0865-004X1B00-003	895	2920	136	2206	713	437	272	427	16	45	4599	74	1991	1	2717	1099	379	19	7761	1672	1680	1049	1446	0	261	39	929	381	2	327	2146	705	181	3073	1172	141	1610	0	524	1	189	262	1545	684	1643
				0865-0051DE00-002	861	3003	155	1781	563	488	548	462	41	111	4983	91	1912	22	3185	1562	324	17	5792	1549	1830	940	2046	1	342	31	730	374	4	487	1782	700	198	3812	896	116	1947	0	600	4	106	250	1893	656	1304
0865-0053VD00-003	0865-0053VD00-003	003-0058	CVD4 R14	0865-0053VD00-003	558	3024	187	2792	632	419	385	344	148	60	2878	40	3299	1	5386	2115	573	24	2089	1191	2313	1285	1703	0	405	47	754	435	5	188	1491	708	360	1569	643	111	2177	0	433	0	29	122	3193	512	1461
				0865-0056DH00-002	567	2137	102	2182	596	378	350	389	73	59	2412	38	2233	0	5393	1639	391	16	2882	1044	1982	786	1582	0	239	24	676	349	3	218	1460	637	199	1837	629	77	2200	0	409	0	35	168	1624	463	944
				0865-005CKF00-003	525	2623	193	2231	707	331	414	252	99	184	3110	38	2798	0	5268	2099	419	25	2836	1112	2095	544	2007	0	341	45	734	434	1	226	2367	668	354	2041	668	76	2246	0	468	0	23	103	2896	548	1020
0865-005PCH00-003	0865-005PCH00-003	003-0067	CVD4 Y2	0865-005PCH00-003	448	1118	60	593	130	155	521	285	27	34	752	35	972	2	968	1427	155	10	1123	858	774	439	916	3	107	20	315	159	0	51	1250	292	216	689	270	102	593	0	231	0	5	124	547	266	196
				0865-005SJA00-002	577	1490	78	1060	361	330	479	305	8	42	1846	35	1956	1	2452	1443	236	13	1941	921	1124	557	888	0	172	63	647	105	0	198	2070	352	233	1373	454	72	910	0	339	2	26	119	770	378	329
				0865-005XKE00-002	645	1687	93	1222	396	408	535	357	26	86	1871	19	1962	1	2754	2154	202	13	1607	848	1179	377	1148	1	202	69	721	130	2	275	1235	492	165	1539	607	57	1083	0	462	0	23	102	957	345	500
0865-006GVF00-003	0865-006GVF00-003	003-0081	CVD4 R7	0865-006GVF00-003	1380	2087	69	1260	637	538	658	545	34	147	2453	26	3101	0	3555	2244	654	27	3092	1020	2717	554	1208	0	158	57	1213	170	1	398	1994	369	282	1125	684	88	1231	0	506	0	102	220	898	724	706
				0865-006LBF00-002	1281	1998	72	1478	766	557	725	564	30	212	3662	42	3019	4	4465	2272	512	4	4572	1424	3423	449	2230	0	203	44	1278	260	1	292	2515	515	280	2658	698	150	1568	0	465	0	55	194	1589	821	616
				0865-006NVA00-002	746	1559	76	1193	298	458	685	325	21	273	1993	25	1951	3	2091	1886	484	4	1734	955	2458	176	1322	2	122	27	583	96	0	457	675	236	349	1598	188	61	869	0	274	0	41	74	1562	427	281
0865-006ZYB00-003	0865-006ZYB00-003	003-2008	CVD4 Y3	0865-006ZYB00-003	529	2350	131	1633	462	344	268	262	14	74	2851	40	2221	8	4526	1622	388	3	2655	987	1098	491	1086	1	272	35	422	180	0	251	1417	598	436	1428	503	77	3053	0	450	0	64	141	1233	380	1105
0865-00700E00-003	0865-00700E00-003	003-2009	CVD4 Y4	0865-00700E00-003	132	272	110	284	90	52	198	92	42	60	240	73	337	139	281	263	131	131	490	189	383	266	310	28	103	25	95	86	7	70	262	132	148	233	66	68	211	71	107	78	33	72	257	107	117
				0865-0074XG00-002	369	2051	159	1291	433	293	424	273	19	176	2294	24	2041	6	4122	2038	432	2	2546	891	1344	284	1150	0	203	52	465	175	1	182	2043	513	496	1650	631	67	2480	0	378	0	18	80	1879	408	614
				0865-00750A00-002	262	326	28	183	103	78	194	133	3	103	367	7	595	5	303	392	215	11	1177	238	1052	59	406	2	36	7	156	65	0	15	714	56	66	367	149	24	169	5	48	4	8	25	386	124	93
				0865-007B3D00-002	1164	2097	37	892	452	456	651	405	41	52	2178	49	1624	2	1446	1232	423	293	1675	929	1679	865	1139	0	478	21	854	225	0	220	1181	533	22	1195	283	142	1070	0	384	7	89	232	935	563	1253
				0865-007B6H00-002	502	2424	184	1288	369	386	443	392	35	149	3218	50	2013	7	3237	1665	406	8	2490	1006	1313	408	1291	0	284	27	529	177	5	293	2030	607	355	2191	689	88	2456	0	466	3	41	88	1536	482	744
[truncated: 17 more columns]
